# Supplementary material for: Hierarchical nickel–cobalt phosphide yolk–shell spheres as highly active and stable bifunctional electrocatalysts for overall water splitting
Source: Royal Society of Chemistry journal article supplement (doi:10.1039/c6nr07009d), 2016-01-01
Supplement: c6nr07009d1.pdf [file c6nr07009d1.pdf]

## Electronic Supplementary Information

# **Hierarchical nickel–cobalt phosphide yolk-shell spheres as highly active and stable bifunctional electrocatalysts for overall water splitting**

*Zhuoxun Yin,<sup>ac</sup> Chunling Zhu,<sup>b\*</sup> Chunyan Li,<sup>a</sup> Shen Zhang,<sup>a</sup> Xitian Zhang<sup>c</sup> and Yujin Chen<sup>a\*</sup>*

<sup>a</sup>Key Laboratory of In-Fiber Integrated Optics, Ministry of Education and College of Science, Harbin Engineering University, Harbin 150001, China. E-mail: chen yujin@hrbeu.edu.cn; Fax: +86-451-82519754; Tel: +86-451-82519754

<sup>b</sup>College of Materials Science and Chemical Engineering, Harbin Engineering University, Harbin 150001, China. E-mail: zhuchunling@hrbeu.edu.cn

<sup>c</sup>Key Laboratory for Photonic and Electronic Bandgap Materials, Ministry of Education, and School of Physics and Electronic Engineering, Harbin Normal University, Harbin 150025, China

\*Corresponding authors.

E-mail addresses: chen yujin@hrbeu.edu.cn and zhuchunling@hrbeu.edu.cn

Tel.: +086-0451-82519754, Fax: +086-0451-82519754

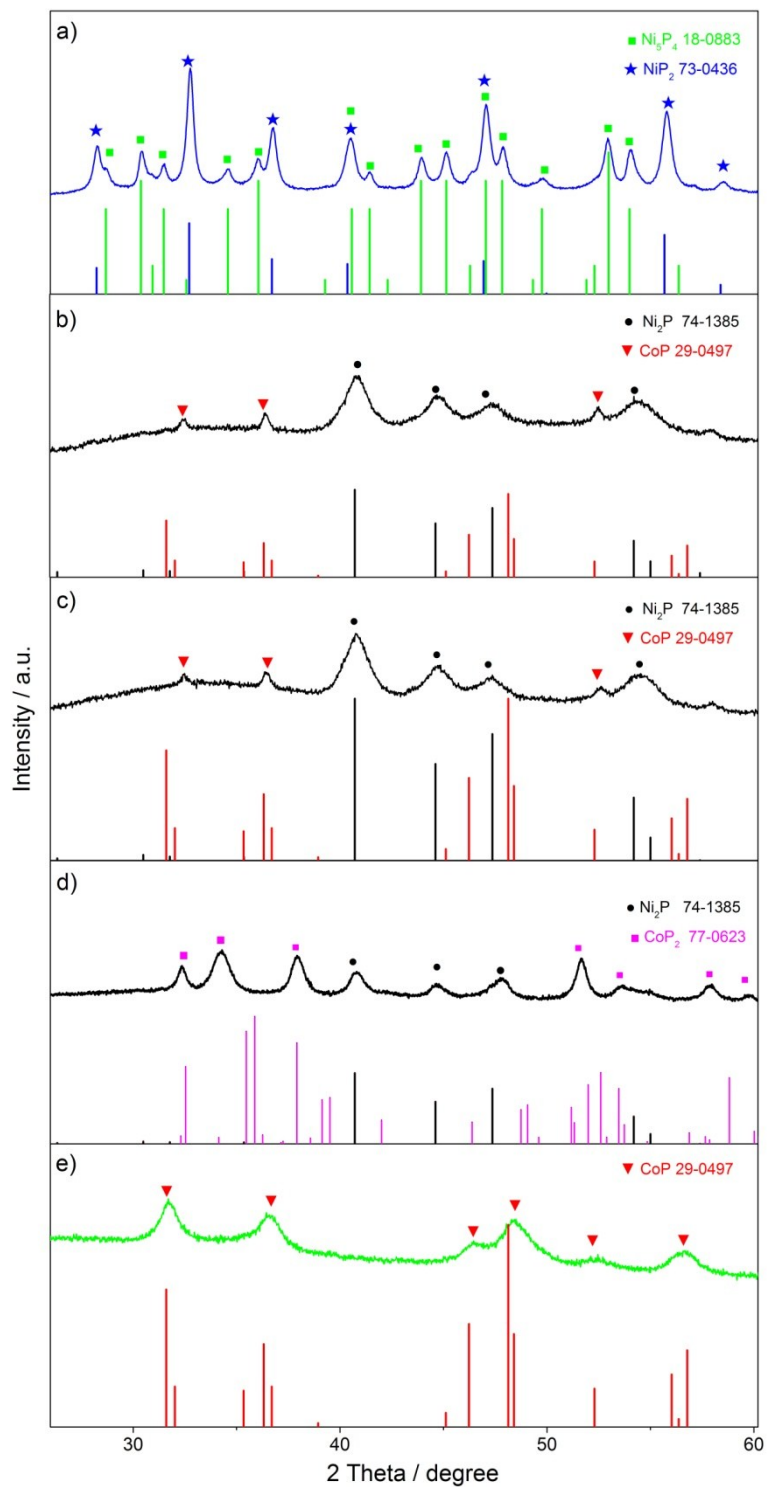

**Figure S1** XRD pattern of (a) Ni-P (b)  $\text{Ni}_{0.78}\text{Co}_{0.22}\text{-P}$  (c)  $\text{Ni}_{0.69}\text{Co}_{0.31}\text{-P}$  (d)  $\text{Ni}_{0.54}\text{Co}_{0.46}\text{-P}$  (e) Co-P.

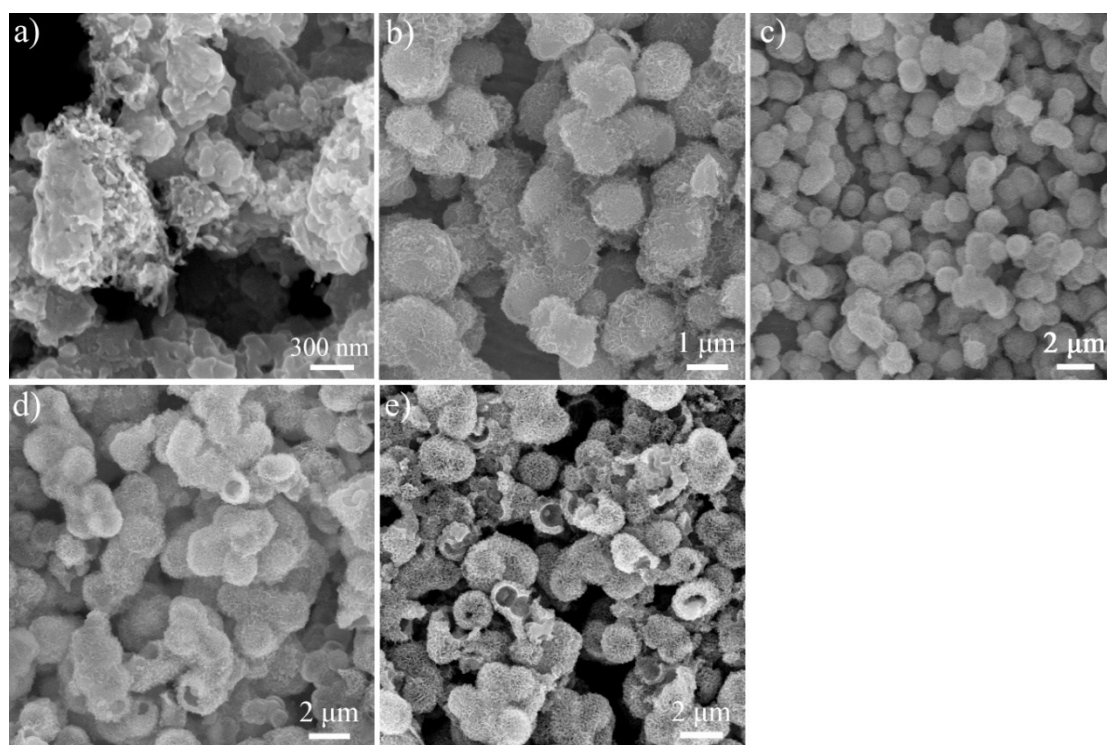

**Figure S2** SEM images of (a) Ni-P (b)  $\text{Ni}_{0.78}\text{Co}_{0.22}\text{-P}$  (c)  $\text{Ni}_{0.69}\text{Co}_{0.31}\text{-P}$  (d)  $\text{Ni}_{0.54}\text{Co}_{0.46}\text{-P}$  (e) Co-P.

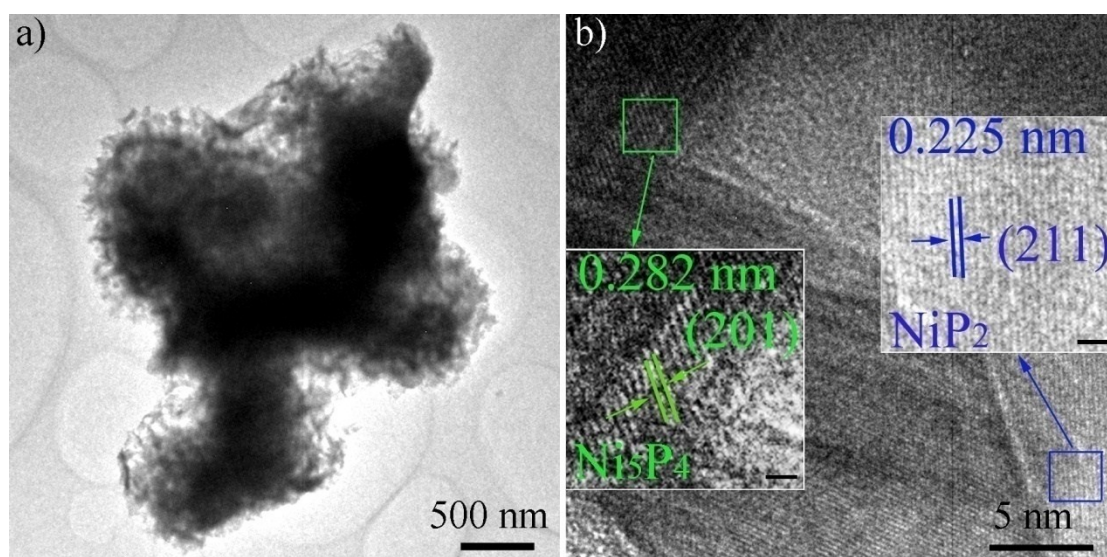

**Figure S3** TEM images of Ni-P catalysts. a) Low-magnification TEM image, and b) HRTEM image. Inset in b) shows the interplanar distances at marked regions.

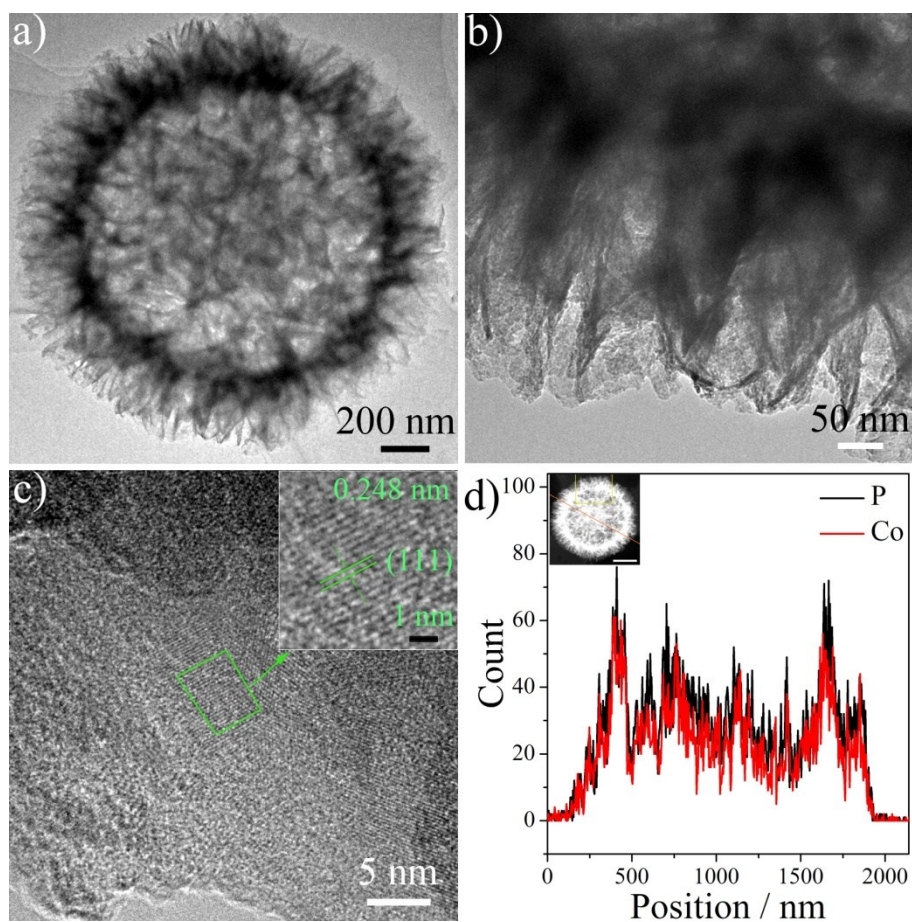

**Figure S4** TEM images of Co-P catalysts. a) Low-magnification TEM image, b) high-magnification TEM image of the outmost layer, c) HRTEM image, and inset shows lattice fringes of marked region, d) linear scanning EDX mapping and the inset shows the corresponding ADF STEM image.

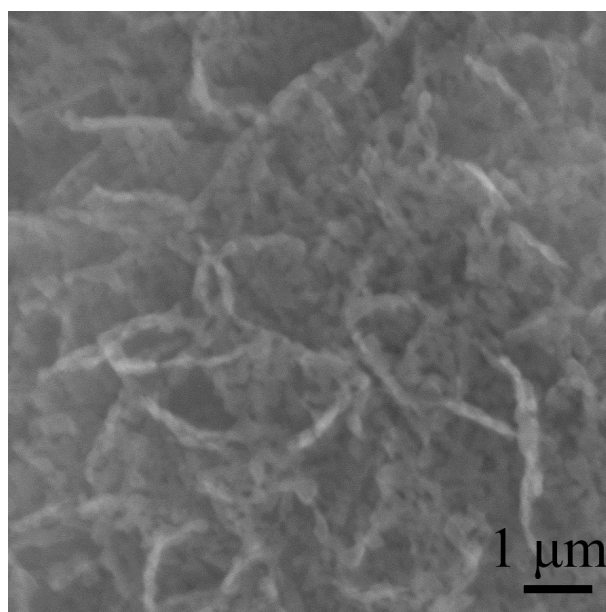

**Figure S5** High-magnification SEM image of the outmost layers of  $\text{Ni}_{0.69}\text{Co}_{0.31}\text{-P}$  catalysts.

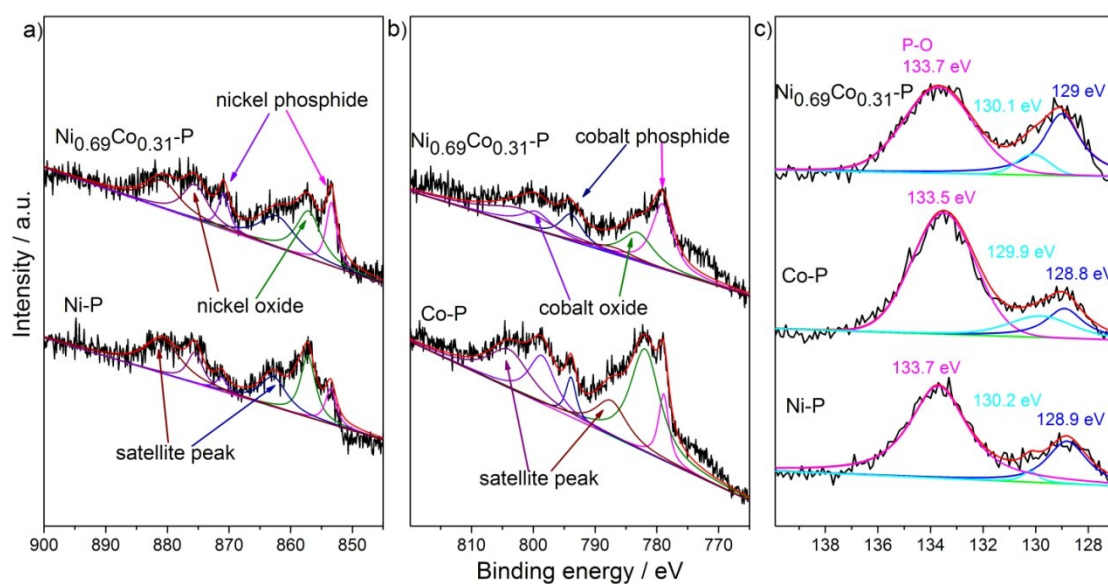

**Figure S6** Comparison of XPS spectrum of Ni-P,  $\text{Ni}_{0.69}\text{Co}_{0.31}\text{-P}$  and Co-P catalysts. a) Ni 2p, b) Co 2p and c) P 2p.

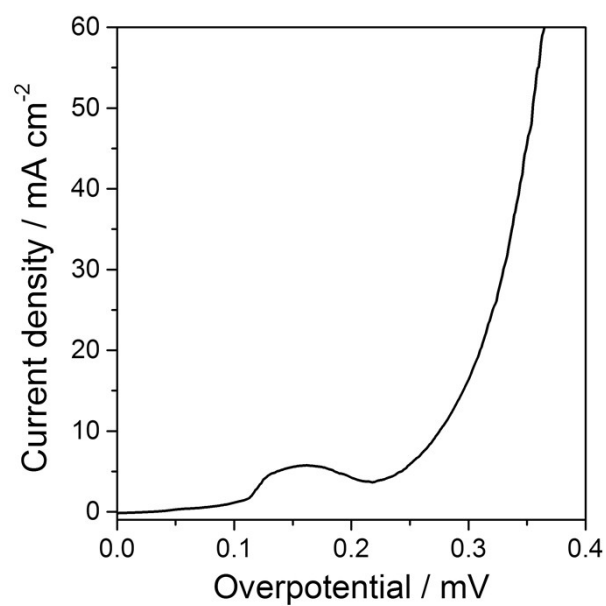

**Figure S7** Polarization curves of  $\text{Ni}_{0.69}\text{Co}_{0.31}\text{-P}$  catalysts at a scan rate of  $0.2 \text{ mV s}^{-1}$  in  $0.1 \text{ M KOH}$

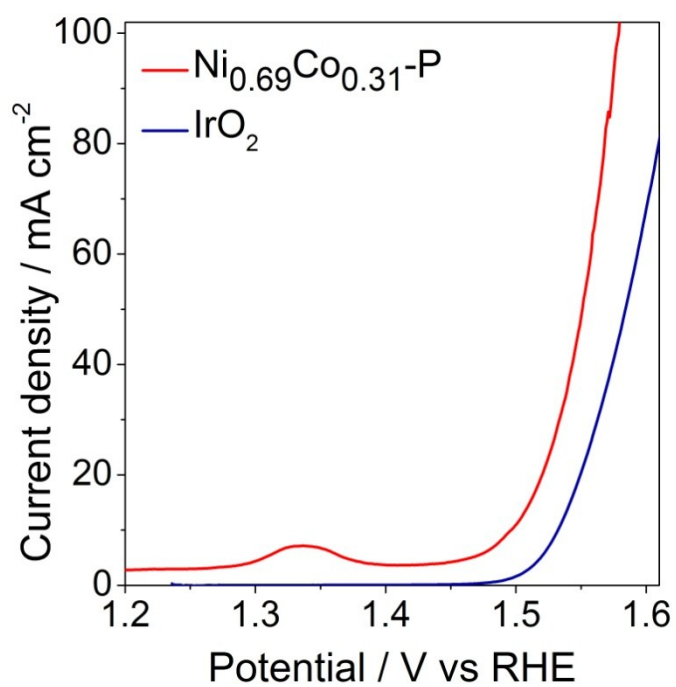

**Figure S8** Polarization curves of  $\text{Ni}_{0.69}\text{Co}_{0.31}\text{-P}$  and  $\text{IrO}_2$  catalysts at a scan rate of  $0.2 \text{ mV s}^{-1}$  in  $1 \text{ M KOH}$

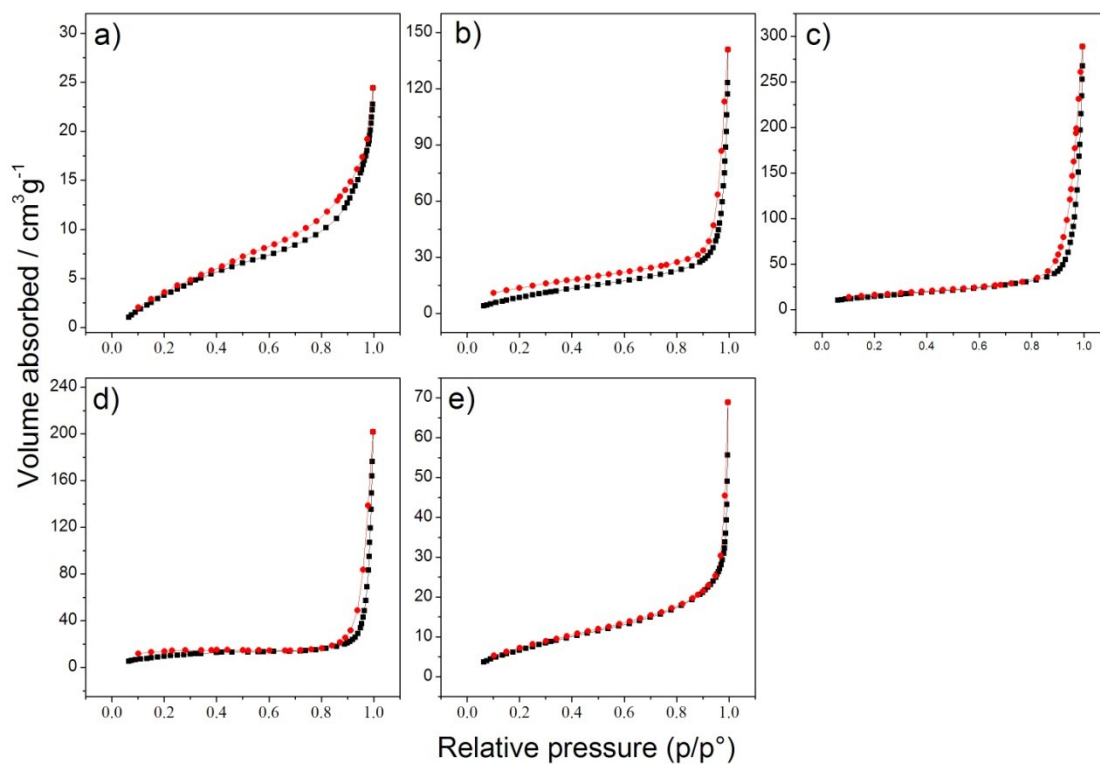

**Figure S9** Nitrogen adsorption and desorption isotherms of (a) Ni-P (b) Ni<sub>0.78</sub>Co<sub>0.22</sub>-P (c) Ni<sub>0.69</sub>Co<sub>0.31</sub>-P (d) Ni<sub>0.54</sub>Co<sub>0.46</sub>-P (e) Co-P.

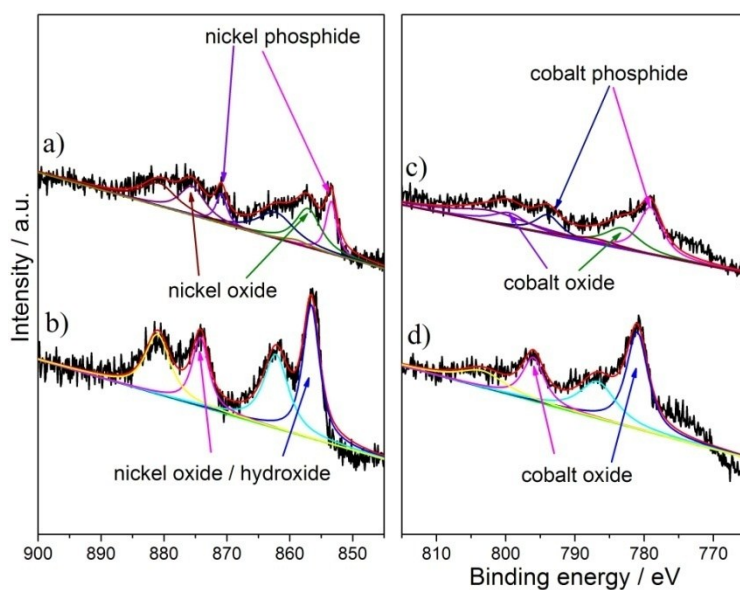

**Figure S10** Comparison of XPS spectrum of Ni<sub>0.69</sub>Co<sub>0.31</sub>-P before and after OER process. a, b) Ni 2p, c, d) Co 2p.

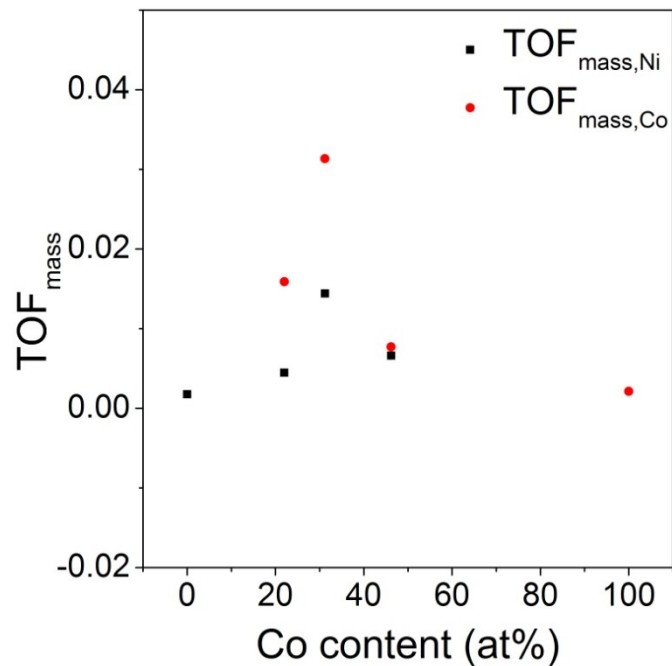

**Figure S11** TOF data for  $\text{Ni}_{1-x}\text{Co}_x\text{-P}$  catalysts is calculated based on the number of metal atoms.

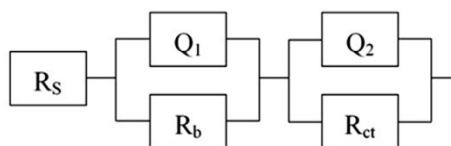

**Figure S12** The equivalent circuit for Nyquist plots of the  $\text{Ni}_{1-x}\text{Co}_x\text{-P}$  electrodes.

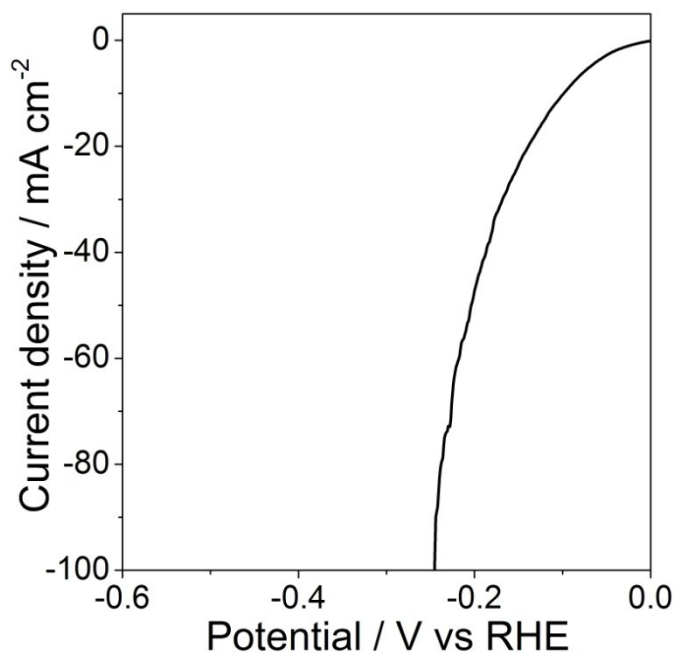

**Figure S13** Polarization curves of  $\text{Ni}_{0.69}\text{Co}_{0.31}\text{-P}$  catalysts for HER at a scan rate of  $5 \text{ mV s}^{-1}$  in  $0.1 \text{ M KOH}$



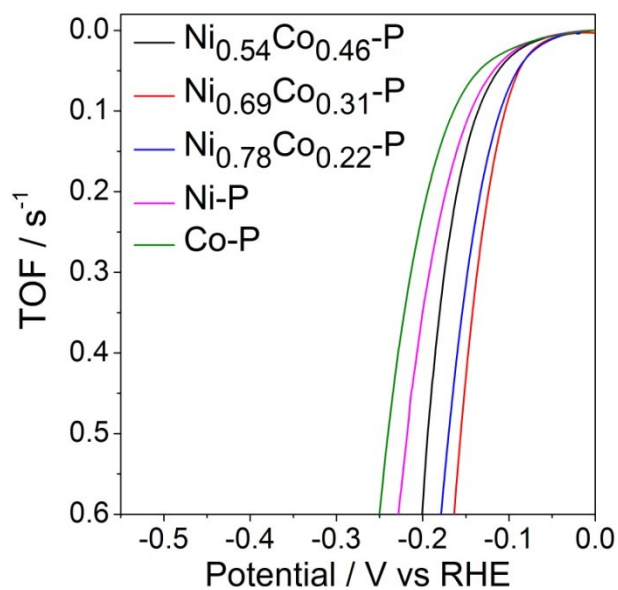

**Figure S14** The TOFs of the  $\text{Ni}_{1-x}\text{Co}_x\text{-P}$  catalysts at different potentials in 1.0 M KOH

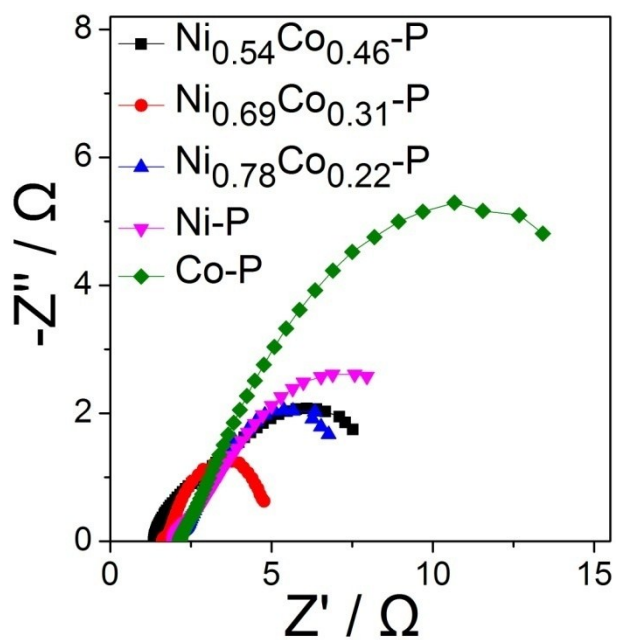

**Figure S15** Nyquist plots of the  $\text{Ni}_{1-x}\text{Co}_x\text{-P}$  catalysts at  $\eta_{\text{HER}}$  of 100 mV

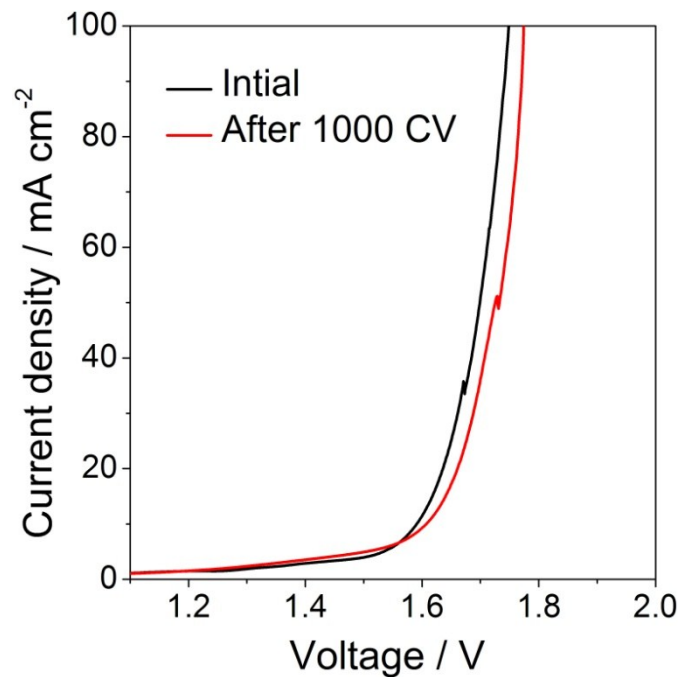

**Figure S16** Stability test for the  $\text{Ni}_{0.69}\text{Co}_{0.31}\text{-P}|\text{Ni}_{0.69}\text{Co}_{0.31}\text{-P}$  catalysts by CV scanning for 1000 cycles in 1.0 M KOH solution at a scan rate of  $50 \text{ mV s}^{-1}$

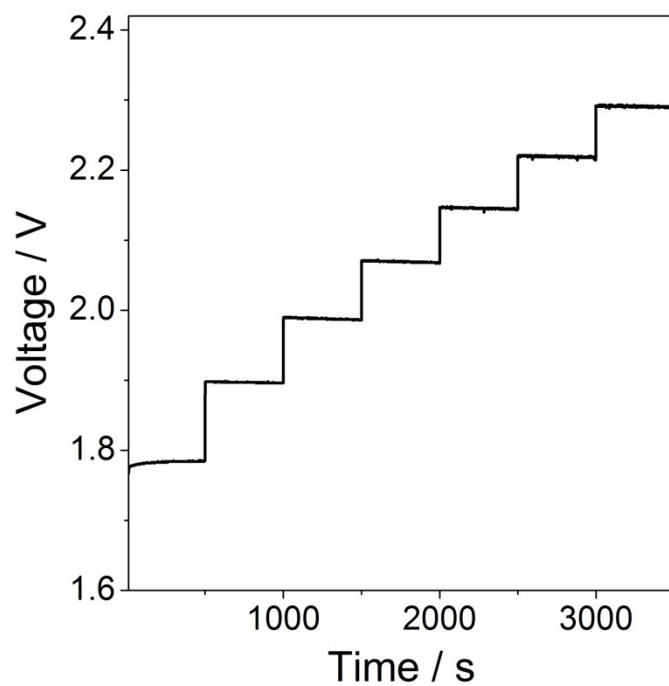

**Figure S17** Multi-step chronopotentiometric curve for the  $\text{Ni}_{0.69}\text{Co}_{0.31}\text{-P}|\text{Ni}_{0.69}\text{Co}_{0.31}\text{-P}$  catalysts in 1.0 M KOH solution

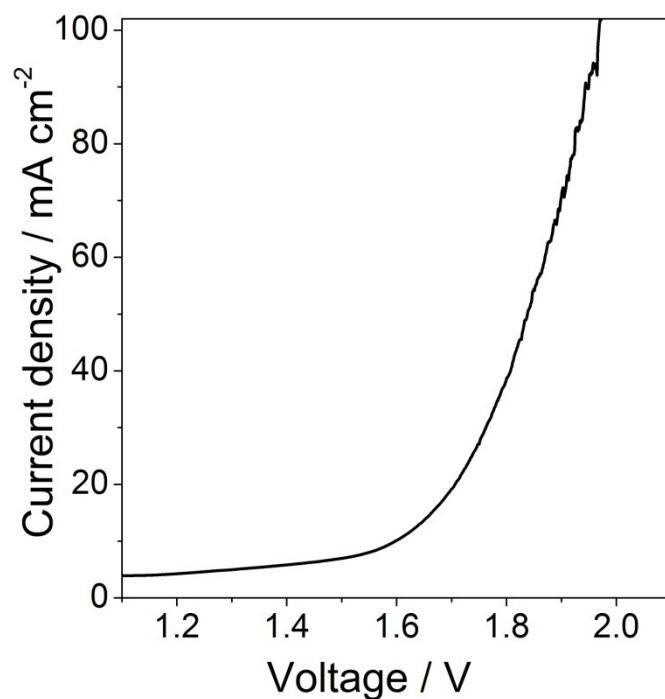

**Figure S18** Polarization curves of  $\text{Ni}_{0.69}\text{Co}_{0.31}\text{-P}|\text{Ni}_{0.69}\text{Co}_{0.31}\text{-P}$  at a scan rate of  $1 \text{ mV s}^{-1}$  in  $0.1 \text{ M KOH}$

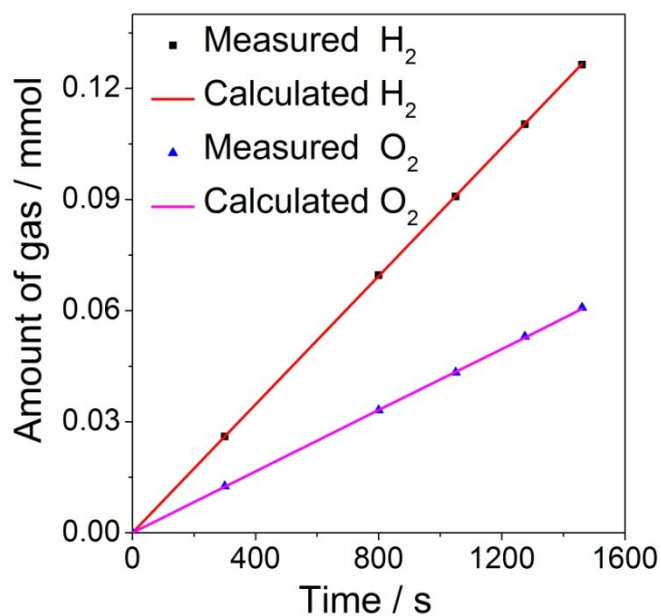

**Figure S19** The amount of gas theoretically calculated and experimentally measured versus time for overall water splitting of  $\text{Ni}_{0.69}\text{Co}_{0.31}\text{-P}|\text{Ni}_{0.69}\text{Co}_{0.31}\text{-P}$

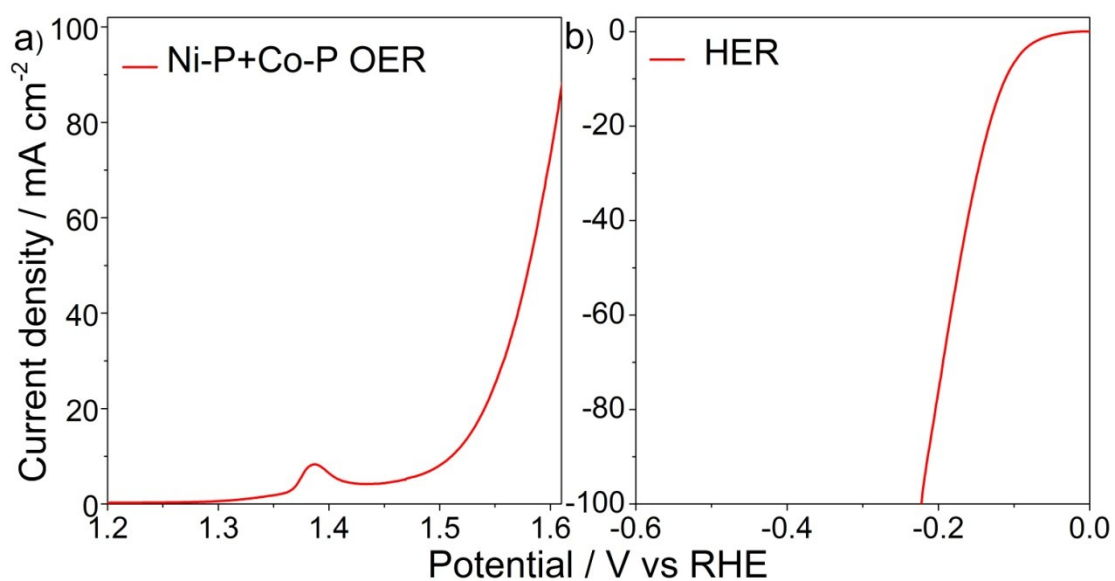

**Figure S20** a) Polarization curves of Ni-P+Co-P catalysts for OER at a scan rate of 0.2 mV s<sup>-1</sup> in 1.0 M KOH, and b) Polarization curves of Ni-P+Co-P catalysts for HER at a scan rate of 5 mV s<sup>-1</sup> in 1.0 M KOH

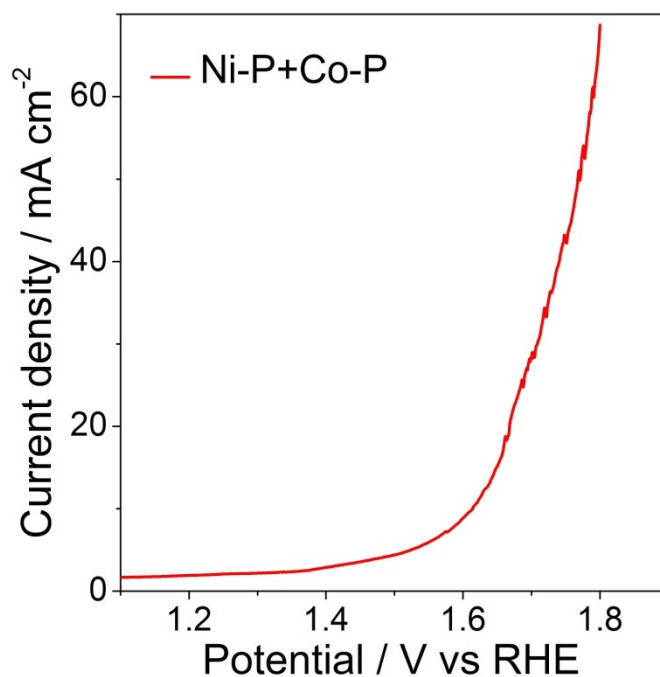

**Figure S21** Polarization curves for the Ni-P+Co-P|Ni-P+Co-P at a scan rate of 1 mV s<sup>-1</sup> in 1.0 M KOH

**Table S1** Determination of x by EDS and ICP-OES ( $x = n_{\text{Co}}/n_{\text{Ni+Co}}$ ,  $n$  molar number)

| Catalysts               | Ni <sub>0.78</sub> Co <sub>0.22</sub> -P | Ni <sub>0.69</sub> Co <sub>0.31</sub> -P | Ni <sub>0.54</sub> Co <sub>0.46</sub> -P |
|-------------------------|------------------------------------------|------------------------------------------|------------------------------------------|
| x determined by EDS     | 0.23                                     | 0.33                                     | 0.48                                     |
| x determined by ICP-OES | 0.21                                     | 0.29                                     | 0.44                                     |
| Average value           | 0.22                                     | 0.31                                     | 0.46                                     |

**Table S2** Comparison of OER activity data among different catalysts.

| Catalysts                                | Overpotential at 10 mA cm <sup>-2</sup> (mV vs RHE) | Current density at 350 mV (mA cm <sup>-2</sup> ) | Electrolyte concentration (pH) | Ref.      |
|------------------------------------------|-----------------------------------------------------|--------------------------------------------------|--------------------------------|-----------|
| Ni <sub>0.69</sub> Co <sub>0.31</sub> -P | 266                                                 | 104                                              | 14                             | This work |
| Ni <sub>0.69</sub> Co <sub>0.31</sub> -P | 276                                                 | 45.5                                             | 13                             | This work |
| FeNC sheets/NiO                          | 390                                                 | 4                                                | 13                             | 7         |
| Co <sub>3</sub> O <sub>4</sub> C-NA      | 290                                                 | <29                                              | 13                             | 8         |
| Au@Co <sub>3</sub> O <sub>4</sub>        | ≈390                                                | 2.84                                             | 13                             | 12        |
| NiO <sub>x</sub>                         | —                                                   | 20 (370 mV)                                      | 14                             | 15        |
| MnO/Au-GC                                | ≈570                                                | 0.23 (400mV)                                     | 13                             | 17        |
| CoO <sub>x</sub> -(a)                    | 390                                                 | 0.9 ± 0.3                                        | 14                             | 18        |
| CoO <sub>x</sub> -(b) (“CoPi”)           | 420                                                 | 0.4 ± 0.1                                        | 14                             | 18        |
| CoFeO <sub>x</sub>                       | 370                                                 | 7 ± 3                                            | 14                             | 18        |
| NiO                                      | 420                                                 | 1.1 ± 0.4                                        | 14                             | 18        |
| NiCeO <sub>x</sub>                       | 430                                                 | 1.6 ± 0.7                                        | 14                             | 18        |
| NiCoO <sub>x</sub>                       | 380                                                 | 6 ± 3                                            | 14                             | 18        |
| NiCuO <sub>x</sub>                       | 410                                                 | 1.4 ± 0.6                                        | 14                             | 18        |
| NiFeO <sub>x</sub>                       | 350                                                 | 15 ± 6                                           | 14                             | 18        |
| NiLaO <sub>x</sub>                       | 410                                                 | 2.5 ± 0.9                                        | 14                             | 18        |

|                                                                                              |      |       |    |    |
|----------------------------------------------------------------------------------------------|------|-------|----|----|
| <b>FeO<sub>x</sub>/CFC</b>                                                                   | 545  | —     | 14 | 20 |
| <b>Ni(OH)<sub>2</sub> films@Au</b>                                                           | 280  | —     | 14 | 23 |
| <b>CoCo-B</b>                                                                                | 390  | 2.019 | 14 | 25 |
| <b>CoCo-NS</b>                                                                               | 353  | 8.628 | 14 | 25 |
| <b>NiCo-B</b>                                                                                | 385  | 3.036 | 14 | 25 |
| <b>NiCo-NS</b>                                                                               | 334  | 22.78 | 14 | 25 |
| <b>NiFe-B</b>                                                                                | 347  | 10.75 | 14 | 25 |
| <b>MWCNTs/Ni(OH)<sub>2</sub></b>                                                             | 474  | —     | 13 | 27 |
| <b>NiOOH</b>                                                                                 | >300 | 15    | 14 | 30 |
| <b>Fe<sub>6</sub>Ni<sub>10</sub>O<sub>x</sub></b>                                            | 286  | —     | 14 | 31 |
| <b>Ni-Fe films</b>                                                                           | 280  | —     | 13 | 32 |
| <b>n-NiFe LDH /NGF</b>                                                                       | 337  | <7.5  | 13 | 35 |
| <b>Ni-Co binary oxide NPL</b>                                                                | 325  | —     | 14 | 45 |
| <b>NiCo<sub>2</sub>O<sub>4</sub> hollow microcuboids</b>                                     | 290  | <100  | 14 | 46 |
| <b>PNG-NiCo</b>                                                                              | >417 | <10   | 14 | 47 |
| <b>Ni@[Ni<sup>(2+/3+)</sup>Co<sub>2</sub>(OH)<sub>6-7</sub>]<sub>x</sub> nanotube arrays</b> | 460  | —     | 14 | 48 |
| <b>NiCo LDH nanosheets</b>                                                                   | 367  | <7    | 14 | 49 |
| <b>NiCo<sub>2.7</sub>(OH)<sub>x</sub></b>                                                    | 350  | 10    | 14 | 50 |
| <b>Ni-CoMoO<sub>4</sub></b>                                                                  | 300  | —     | 14 | 52 |

|                                                                        |     |      |    |    |
|------------------------------------------------------------------------|-----|------|----|----|
| <b>CoMn LDH</b>                                                        | 324 | 42.5 | 14 | 53 |
| <b>Co<sub>3</sub>O<sub>4</sub>/NiCo<sub>2</sub>O<sub>4</sub> DSNCs</b> | 340 | <22  | 14 | 54 |
| <b>NiOOH/Ni<sub>5</sub>P<sub>4</sub></b>                               | 290 | <60  | 14 | 58 |
| <b>Ni<sub>2</sub>P nanowires</b>                                       | 290 | —    | 14 | 59 |
| <b>CoP/C</b>                                                           | 360 | <20  | 13 | 60 |
| <b>CoP –CNT</b>                                                        | 330 | —    | 13 | 61 |
| <b>CoP hollow polyhedron</b>                                           | 400 | <5   | 14 | 62 |
| <b>CoP based nanoneedle arrays</b>                                     | 281 | —    | 14 | 63 |
| <b>CoP/rGO</b>                                                         | 340 | <20  | 14 | 64 |
| <b>Co-P film</b>                                                       | 345 | <20  | 14 | 65 |
| <b>nickel–phosphorous films</b>                                        | 344 | <20  | 14 | 67 |
| <b>Ni<sub>2</sub>P NWs</b>                                             | 400 | <5   | 14 | 70 |
| <b>Ni-P</b>                                                            | 300 | —    | 14 | 71 |
| <b>NG-CoSe<sub>2</sub></b>                                             | 366 | <8   | 13 | 76 |

**Table S3** Comparison of HER activity data among different catalysts.

| Catalyst                                             | Tafel slope (mV dec <sup>-1</sup> ) | Overpotential at 10 mA cm <sup>-2</sup> (mV vs RHE) | Overpotential at 100 mA cm <sup>-2</sup> (mV vs RHE) | Electrolyte concentration (pH) | Ref.      |
|------------------------------------------------------|-------------------------------------|-----------------------------------------------------|------------------------------------------------------|--------------------------------|-----------|
| Ni <sub>0.69</sub> Co <sub>0.31</sub> -P             | 47                                  | 96                                                  | 167                                                  | 14                             | This work |
| Co@CoO/NG                                            | 122                                 | 82                                                  | 221                                                  | 14                             | 19        |
| NiCo <sub>2</sub> O <sub>4</sub> Hollow Microcuboids | 49.7                                | 110                                                 | 245                                                  | 14                             | 46        |
| NiSe/NF                                              | 43                                  | 96                                                  | >200                                                 | 14                             | 55        |
| CoO <sub>x</sub> @CN                                 | —                                   | —                                                   | >200                                                 | 14                             | 56        |
| PCPTF                                                | —                                   | >350                                                | >500                                                 | 14                             | 57        |
| Ni <sub>5</sub> P <sub>4</sub>                       | —                                   | 150                                                 |                                                      | 14                             | 58        |
| CoP/C                                                | —                                   | >200                                                | >250                                                 | 14                             | 60        |
| CoP hollow polyhedron                                | 59                                  | 159                                                 | >300                                                 | 0                              | 62        |
| CoP-based nanoneedle arrays                          | 69                                  | 114                                                 | >200                                                 | 14                             | 63        |
| CoP/rGO-400                                          | 38                                  | 150                                                 | >250                                                 | 14                             | 64        |
| Co-P film                                            | 42                                  | 94                                                  | —                                                    | 14                             | 65        |
| CoP NCs                                              | 46                                  | —                                                   | 180                                                  | 0                              | 72        |
| MoP <sub>2</sub> NS/CC                               | 63.6                                | 115                                                 | —                                                    | 0                              | 74        |



**Table S4** Comparison of the electrochemical performance of Ni<sub>0.69</sub>Co<sub>0.31</sub>-P|Ni<sub>0.69</sub>Co<sub>0.31</sub>-P as bifunctional catalysts for overall water splitting in 1.0 M KOH with recently published results.

| Catalyst                                             | Voltage at 10 mA cm <sup>-2</sup> (V) | Voltage at 100 mA cm <sup>-2</sup> (V) | Electrolyte concentration (pH) | Ref.      |
|------------------------------------------------------|---------------------------------------|----------------------------------------|--------------------------------|-----------|
| Ni <sub>0.69</sub> Co <sub>0.31</sub> -P             | 1.59                                  | 1.749                                  | 14                             | This work |
| Co@CoO/NG                                            | 1.6                                   | 1.7                                    | 14                             | 19        |
| NiCo <sub>2</sub> O <sub>4</sub> Hollow Microcuboids | 1.65                                  | —                                      | 14                             | 46        |
| NiSe/NF                                              | 1.63                                  | >2                                     | 14                             | 55        |
| CoO <sub>x</sub> @CN                                 | 1.55                                  | —                                      | 14                             | 56        |
| Ni <sub>5</sub> P <sub>4</sub>                       | 1.7                                   | >2.1                                   | 14                             | 58        |
| Ni <sub>2</sub> P                                    | 1.63                                  | >1.75                                  | 14                             | 59        |
| CoP-based nanoneedle                                 | 1.61                                  | >1.75                                  | 14                             | 63        |
| CoP/rGO-400                                          | 1.7                                   | >1.8                                   | 14                             | 64        |
| Co-P                                                 | >1.6                                  | 1.744                                  | 14                             | 65        |
| Ni-P                                                 | 1.67                                  | >1.8                                   | 14                             | 67        |
| Ni-P foam                                            | 1.64                                  | 2.05                                   | 14                             | 68        |

**Table S5** Comparison of the electrochemical performance of Ni<sub>0.69</sub>Co<sub>0.31</sub>-P and Ni-P+C-P catalysts

| Catalyst                                 | OER                                                 | HER                                                 | overall water splitting           |
|------------------------------------------|-----------------------------------------------------|-----------------------------------------------------|-----------------------------------|
|                                          | Overpotential at 10 mA cm <sup>-2</sup> (mV vs RHE) | Overpotential at 10 mA cm <sup>-2</sup> (mV vs RHE) | Voltage at 10 mA cm <sup>-2</sup> |
| Ni <sub>0.69</sub> Co <sub>0.31</sub> -P | 266                                                 | 96                                                  | 1.59                              |
| Ni-P+C-P                                 | 291                                                 | 112                                                 | 1.62                              |
